# Supplementary material
Source: MDPI journal article supplement (https://www.mdpi.com/2077-0472/7/4/34)
Supplement: s1 [file s1]

| **Supplemental Table 1.** Soil type and crop production history for experimental locations. | | | | |
| --- | --- | --- | --- | --- |
| **Study/Year/Location** |  | **Soil Type** |  | **Crop Production History** |
| *ROSE (2011 – 2013)a* | | |  |  |
| Penn State University  Rock Springs, PA |  | Hagerstown silt loam (fine, mixed) and Opequon-Hagerstown (clayey, mixed) |  | Long-term no-till corn-soybean system prior to study. Organic transition period in 2011-2013. |
|  |  |  |  |  |
| USDA-ARS  Beltsville, MD |  | Codorus-Hatboro silt loam (fine-loamy, mixed, active, mesic,  Fluvaquentic Dystrudepts and Endoaquepts |  | Long-term no-till corn-soybean-wheat system prior to study. Organic transition period in 2009-2012. |
|  |  |  |  |  |
| University of Delaware  Georgetown, DE |  | Pepperbox loamy sand (loamy-mixed), Klej loam sand (mesic) and Hurlock loamy sand (coarse-loamy) |  | Conventionally tilled corn-soybean system prior to study. Organic transition period in 2011-2013. |
|  |  |  |  |  |
| *No-Till Corn and Soybean (2008-2016)b* | | |  |  |
| USDA-ARS  Beltsville, MD |  | Codorus-Hatboro silt loam (fine-loamy, mixed, active, mesic,  Fluvaquentic Dystrudepts and Endoaquepts |  | Long-term organic corn-soybean-wheat rotation (certified in 2000). |
|  |  |  |  |  |
| *Barley Experiments (2013-2014)c* | | |  |  |
| Cornell University  Penn Yan, NY |  | Cayuga silt loam (fine, illitic, mesic) and Honeoye silt loam (fine-loamy, mixed, semiactive, mesic) |  | Long term organic management prior to study (corn, soybean, small grains). |
|  |  |  |  |  |
| USDA-ARS  Beltsville, MD |  | Codorus-Hatboro silt loam (fine-loamy, mixed, active, mesic,  Fluvaquentic Dystrudepts and Endoaquepts |  | Long-term conventional management prior to experiment (wheat was preceding crop). |
|  | | |  |  |
| *Rye-Vetch Mixture Experiment (2013 – 2014) d* | | |  |  |
| USDA-ARS  Beltsville, MD |  | Codorus-Hatboro silt loam (fine-loamy, mixed, active, mesic,  Fluvaquentic Dystrudepts and Endoaquepts |  | Long-term organic corn-soybean-wheat rotation (certified in 2000). |
| a  ROSE, Reduced-tillage Organic Systems Experiment (Table 1-2; Figures 2,4,6);  b Figure 1;  c Figure 3;  d Figure 5 | | | | |
